# Supplementary material for: IQGAP2 Inhibits Migration and Invasion of Gastric Cancer Cells via Elevating SHIP2 Phosphatase Activity
Source: PubMed Central journal article supplement (PMC7139352; doi:10.3390/ijms21061968), 2020-03-13
Supplement: ijms-21-01968-s001.pdf [file ijms-21-01968-s001.pdf]

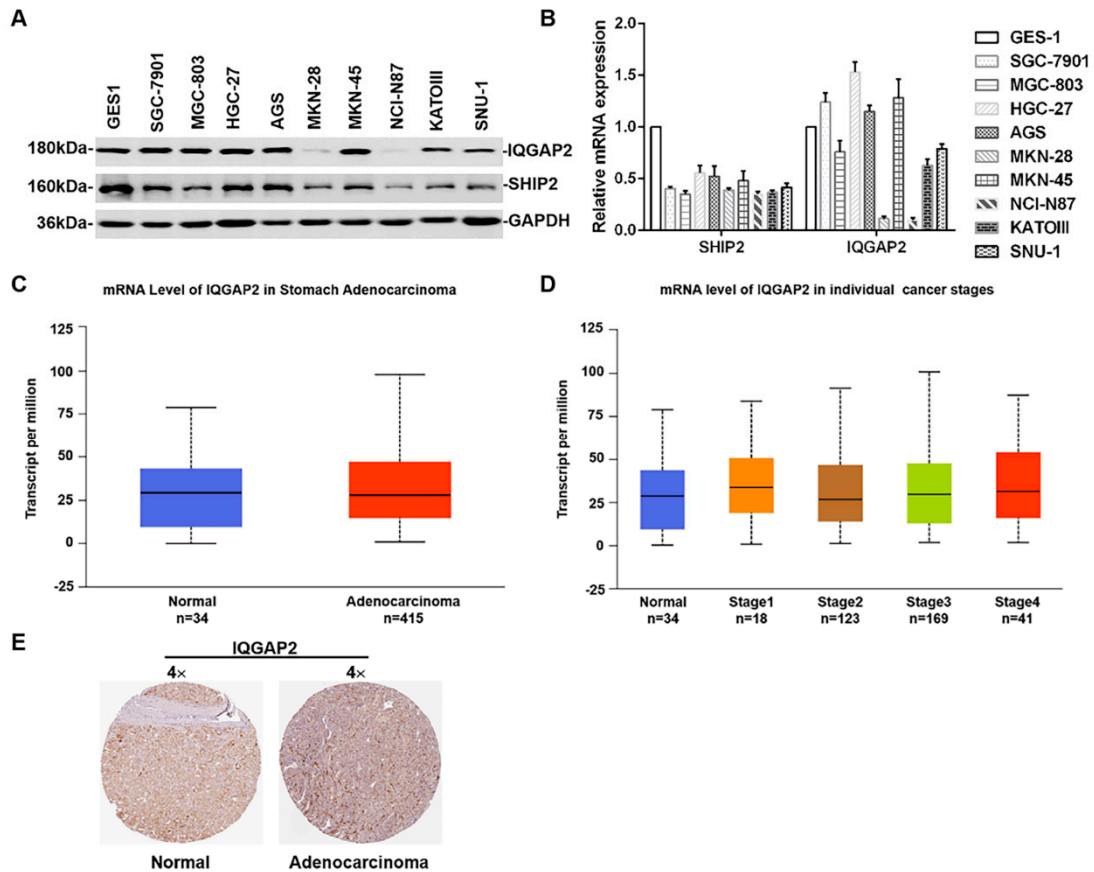

**Figure S1.** Expression of IQGAP2 and SHIP2 in human GC. (A) Whole cell lysates from the normal gastric mucosa epithelial cells GES-1 and a panel of GC cells were subjected to Western blot analysis. Data shown are representative of three individual experiments; (B) The mRNA levels of SHIP2 and IQGAP2 from GES-1 cells and a panel of GC cells were detected by qRT-PCR. The relative abundance of target gene mRNA expression in GES-1 was arbitrarily designated as 1 ( $n = 3$ , mean  $\pm$  SEM); (C) The mRNA levels of IQGAP2 in tissue samples of stomach adenocarcinoma were compared with those in normal tissues. Images were obtained from UALCAN database (<http://ualcan.path.uab.edu>); (D) The mRNA levels of IQGAP2 in tissue samples at different individual clinical stages were compared with those in normal tissues. Images were obtained from TCGA database using UALCAN platform (<http://ualcan.path.uab.edu>); (E) Representative images of immunohistochemical staining of IQGAP2 (brown) on stomach adenocarcinoma specimens and normal stomach tissues were obtained from HPA database (<http://www.proteinatlas.org>).
